# Supplementary material for: Complete chloroplast genome sequences of Dioscorea: Characterization, genomic resources, and phylogenetic analyses
Source: PubMed Central journal article supplement (PMC6284424; doi:10.7717/peerj.6032), 2018-12-04

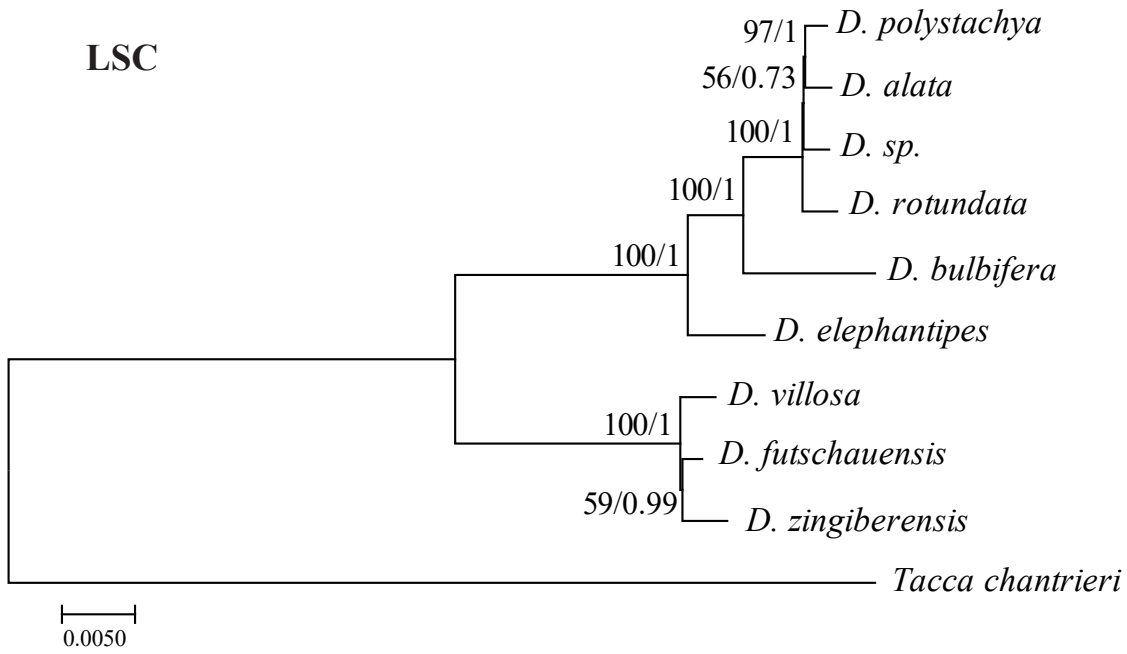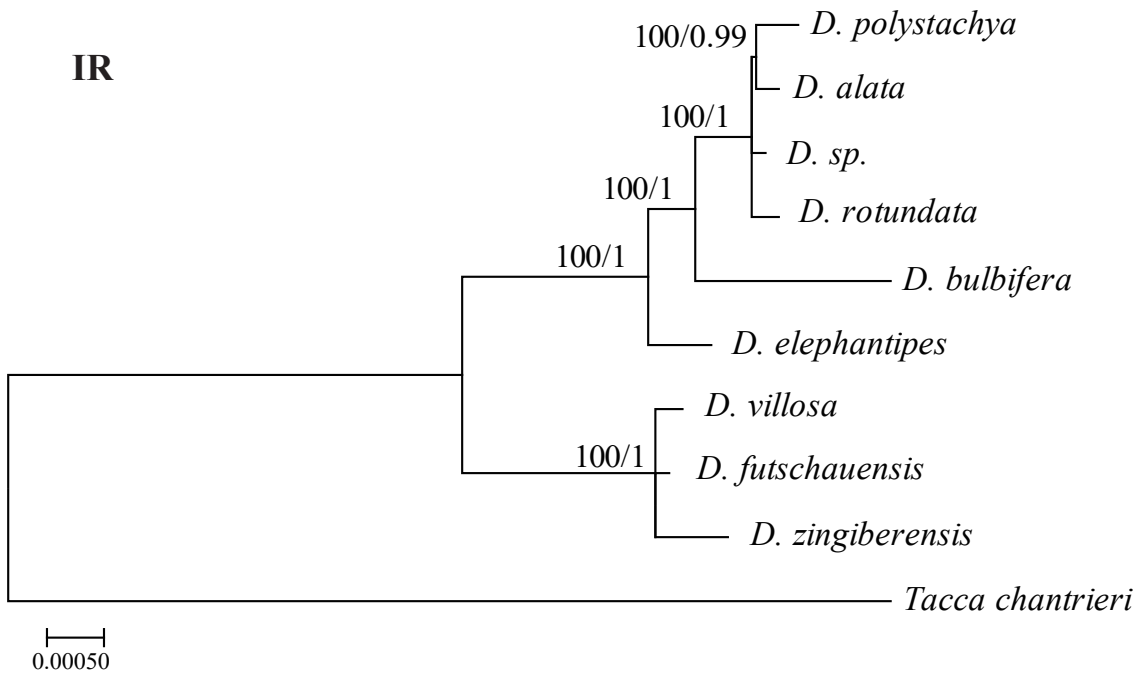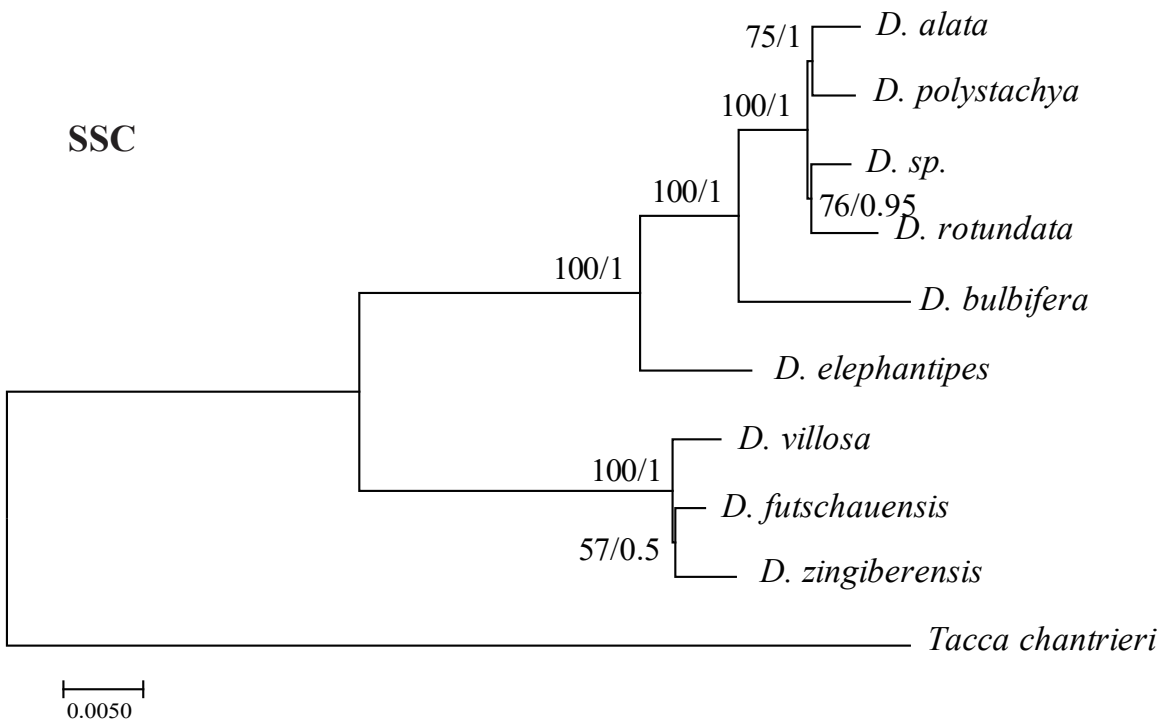

Supplement: peerj-06-6032-s001.pdf [file peerj-06-6032-s001.pdf]
