# Supplementary material for: Complete chloroplast genome sequences of Dioscorea: Characterization, genomic resources, and phylogenetic analyses
Source: PubMed Central journal article supplement (PMC6284424; doi:10.7717/peerj.6032), 2018-12-04

*D. bulbifera*  
*D. aspersa*  
*D. rotundata*  
*D. polystachya*  
*D. alata*  
*D. zingiberensis*  
*D. fuschauensis*  
*D. villosa*

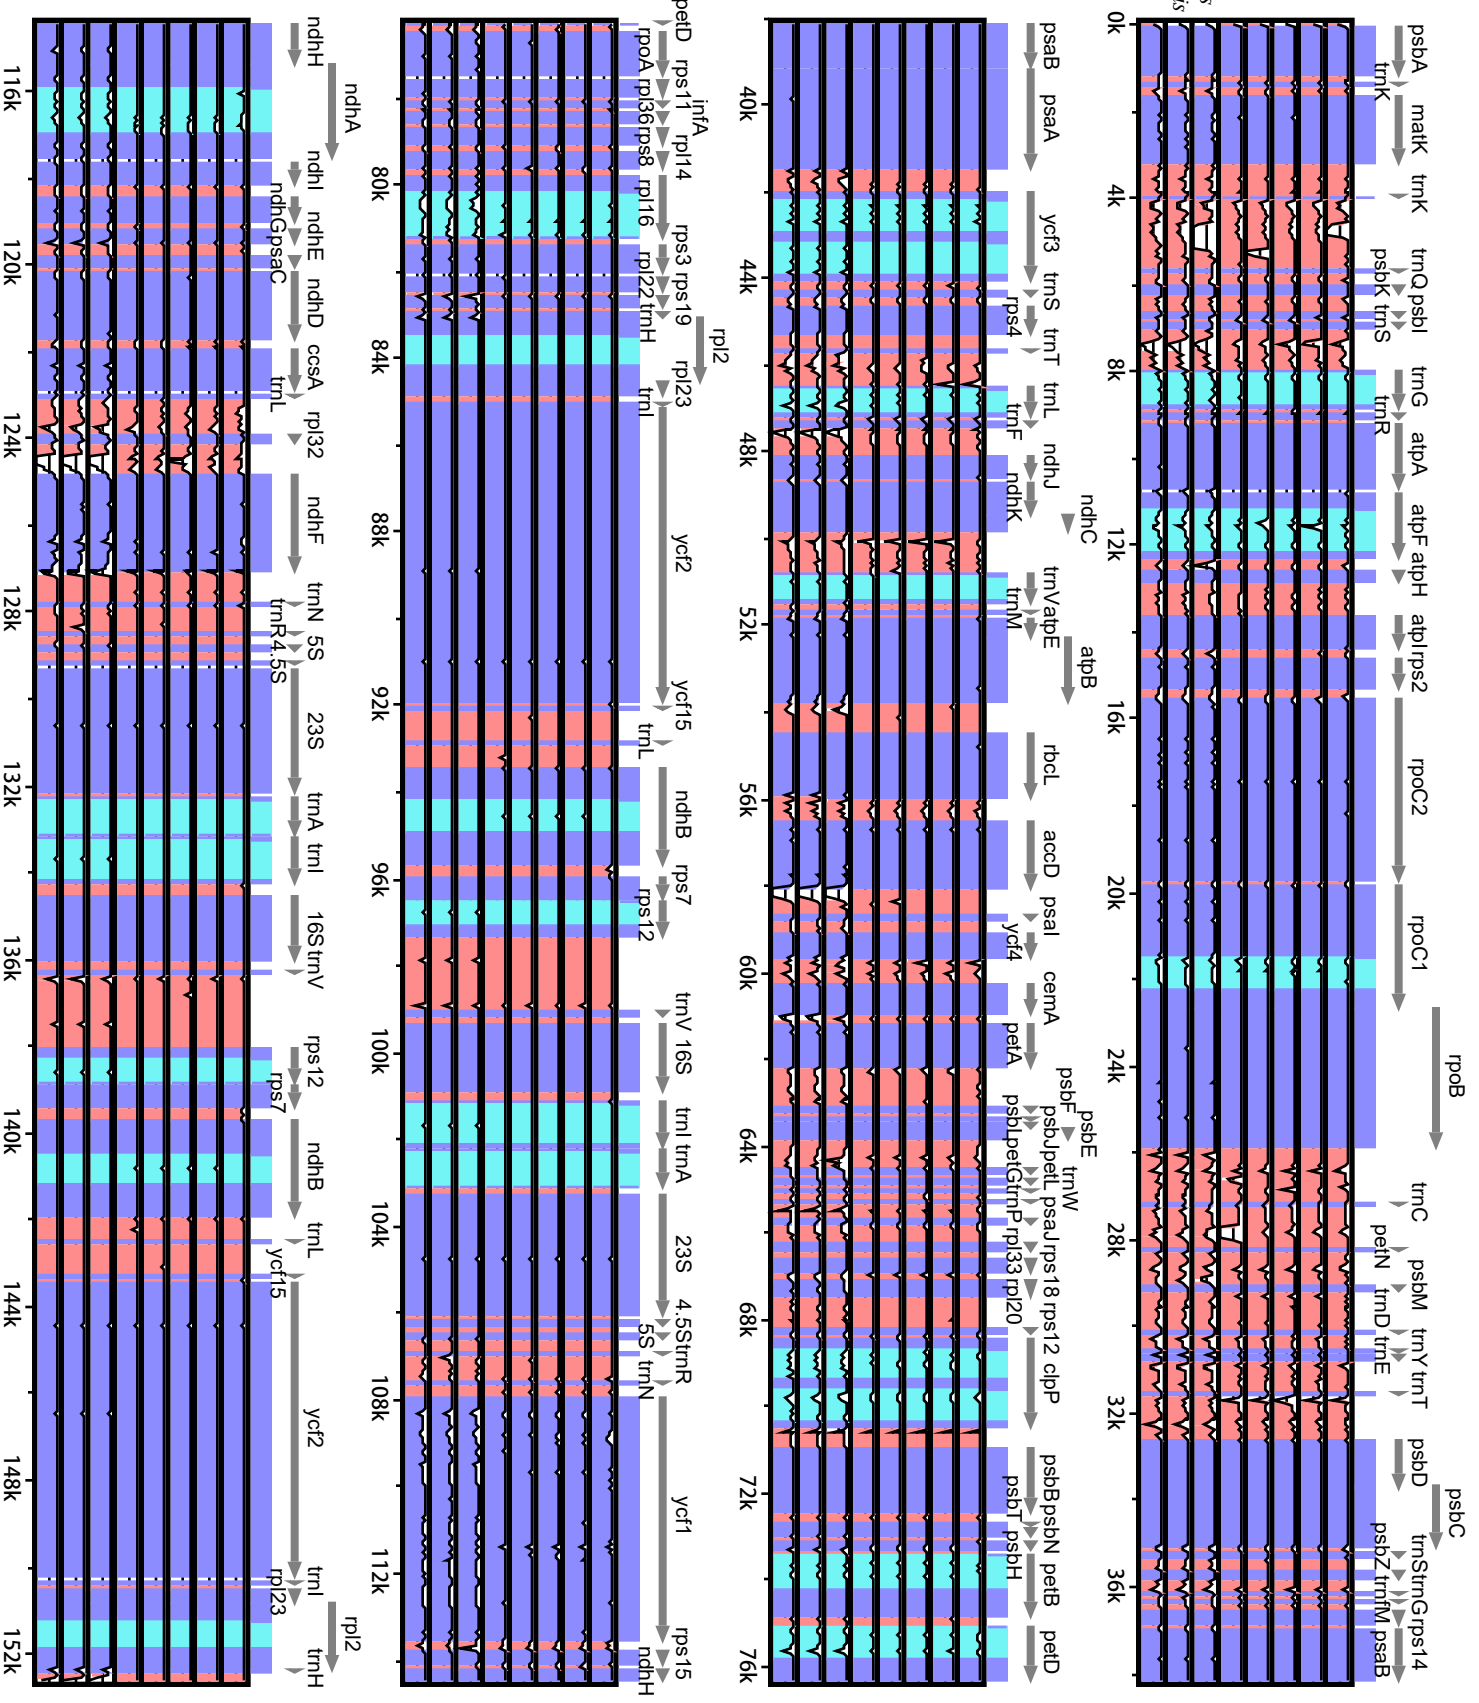

Supplement: peerj-06-6032-s002.pdf [file peerj-06-6032-s002.pdf]
