# Supplementary material for: Complete chloroplast genome sequences of Dioscorea: Characterization, genomic resources, and phylogenetic analyses
Source: PubMed Central journal article supplement (PMC6284424; doi:10.7717/peerj.6032), 2018-12-04

**trnK-trnQ**

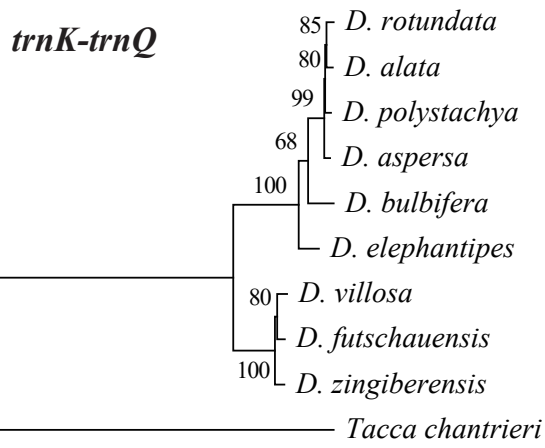

**trnC-petN**

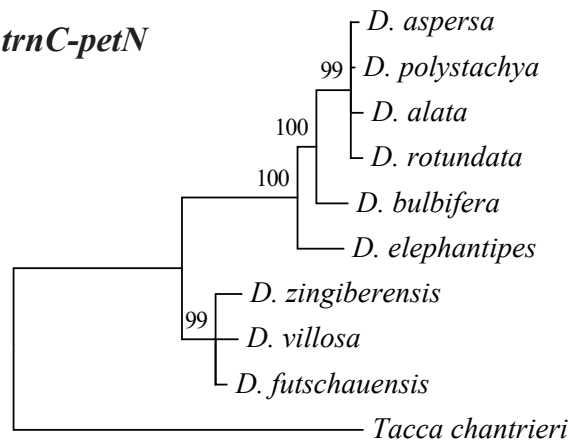

**petG-trnW-trnP**

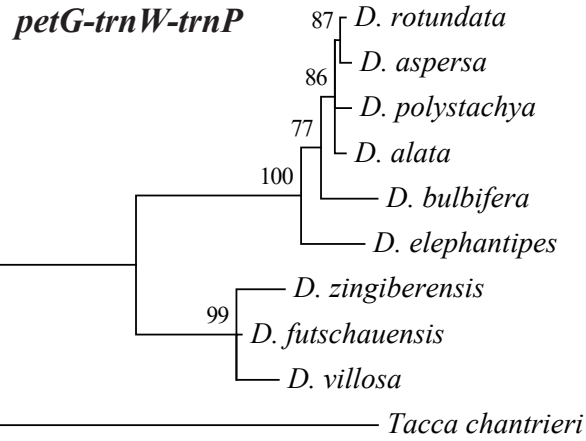

**trnL-rpl32**

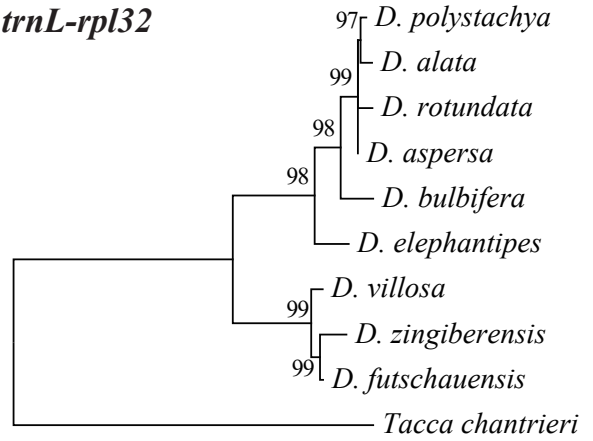

**ndhF**

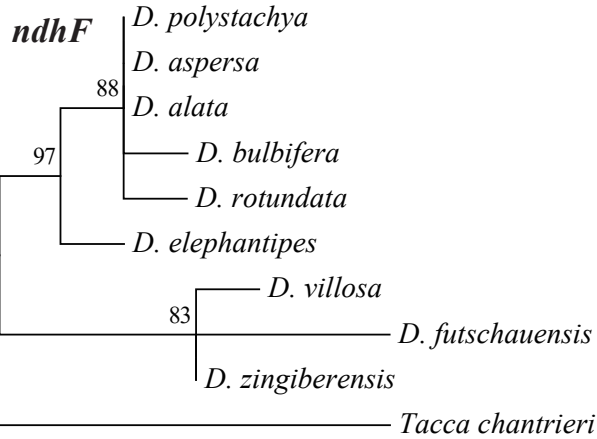

**trnS-trnG**

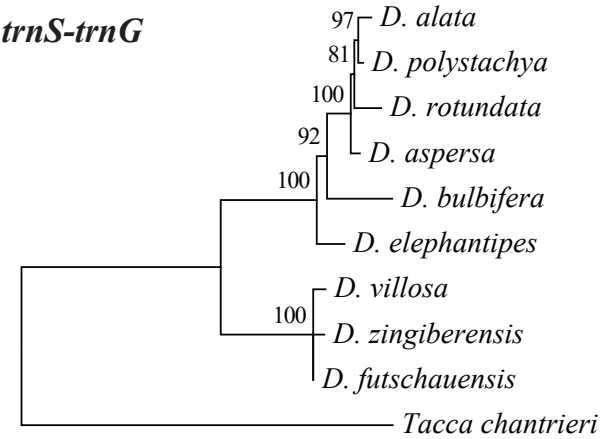

**trnE-trnT**

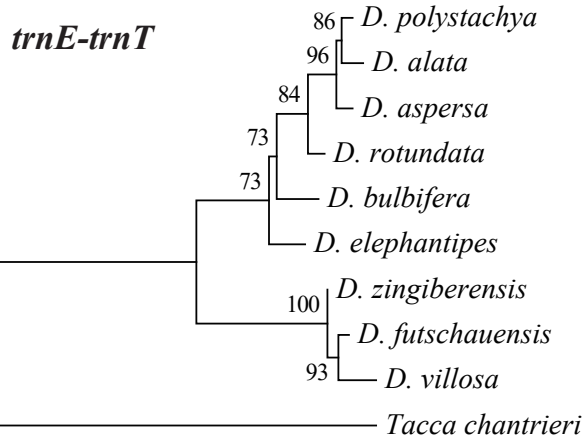

**yef1**

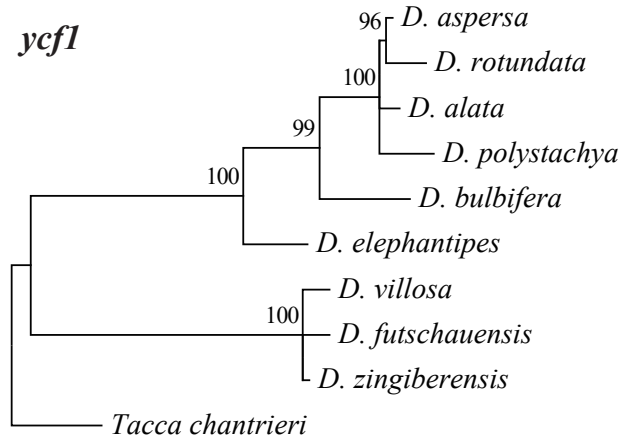

Supplement: peerj-06-6032-s003.pdf [file peerj-06-6032-s003.pdf]
